# Supplementary material
Source: Elsevier journal article supplement (https://comptes-rendus.academie-sciences.fr/geoscience/article/10.1016/j.crte.2008.12.005/file/attach/mmc1.pdf)
Supplement: mmc1 [file mmc1.pdf]

Table 1. Laser-MC-ICPMS U-Pb zircon data for paragneiss "Toulon A1" from the Giens peninsula (France), and orthogneiss of Santa Maria (Sardinia, Italy).

Tableau 1. Analyses U-Pb sur zircon Laser-MC-ICPMS pour les paragneiss "Toulon A1" de la presqu'île de Giens (France) de Toulon (France), et des orthogneiss de Santa Maria (Sardaigne, Italie).

| Grain.<br>spot              | U<br>(ppm) | Th<br>(ppm) | Th/U | <sup>206</sup> Pb*<br>(ppm) | <sup>206</sup> Pb/<br><sup>204</sup> Pb | f <sub>206</sub><br>% | Total                                  |       |                                         |         | Radiogenic                             |        | Age (Ma)                               |    |
|-----------------------------|------------|-------------|------|-----------------------------|-----------------------------------------|-----------------------|----------------------------------------|-------|-----------------------------------------|---------|----------------------------------------|--------|----------------------------------------|----|
|                             |            |             |      |                             |                                         |                       | <sup>238</sup> U/<br><sup>206</sup> Pb | ±     | <sup>207</sup> Pb/<br><sup>206</sup> Pb | ±       | <sup>206</sup> Pb/<br><sup>238</sup> U | ±      | <sup>206</sup> Pb/<br><sup>238</sup> U | ±  |
|                             |            |             |      |                             |                                         | [2]                   | [1]                                    | [1]   | [1]                                     | [3]     | [1]                                    | [1]    | [1]                                    |    |
| <b>07 TOULON 01</b>         |            |             |      |                             |                                         |                       |                                        |       |                                         |         |                                        |        |                                        |    |
| 4.1                         | 801        | 109         | 0.14 | 62.3                        | 17 054                                  | 0.320                 | 11.097                                 | 0.087 | 0.06130                                 | 0.00020 | 0.0898                                 | 0.0007 | 554                                    | 4  |
| 5.1                         | 84         | 14          | 0.17 | 6.8                         | 898                                     | 0.650                 | 10.528                                 | 0.121 | 0.06472                                 | 0.00072 | 0.0944                                 | 0.0011 | 581                                    | 6  |
| 7.1                         | 439        | 303         | 0.69 | 32.5                        | 5 079                                   | 0.676                 | 11.568                                 | 0.195 | 0.06358                                 | 0.00044 | 0.0859                                 | 0.0015 | 531                                    | 9  |
| 8.1                         | 153        | 100         | 0.66 | 18.9                        | 2 975                                   | 0.449                 | 6.936                                  | 0.078 | 0.07158                                 | 0.00048 | 0.1435                                 | 0.0016 | 865                                    | 9  |
| 10.1                        | 263        | 140         | 0.53 | 32.1                        | 16 085                                  | 1.131                 | 6.920                                  | 0.123 | 0.07711                                 | 0.00064 | 0.1429                                 | 0.0025 | 861                                    | 14 |
| 11.1                        | 611        | 95          | 0.15 | 50.0                        | 5 798                                   | 0.326                 | 10.542                                 | 0.121 | 0.06211                                 | 0.00038 | 0.0945                                 | 0.0011 | 582                                    | 6  |
| 12.1                        | 467        | 390         | 0.83 | 35.4                        | 471 036                                 | 0.374                 | 11.142                                 | 0.210 | 0.06169                                 | 0.00043 | 0.0894                                 | 0.0017 | 552                                    | 10 |
| 13.1                        | 287        | 229         | 0.80 | 25.5                        | 2 827                                   | 0.165                 | 9.497                                  | 0.093 | 0.06248                                 | 0.00029 | 0.1051                                 | 0.0010 | 644                                    | 6  |
| 14.1                        | 121        | 33          | 0.27 | 9.9                         | 3 755                                   | 0.126                 | 10.470                                 | 0.117 | 0.06061                                 | 0.00052 | 0.0954                                 | 0.0011 | 587                                    | 6  |
| 15.1                        | 1191       | 431         | 0.36 | 87.1                        | 133 452                                 | 0.425                 | 11.697                                 | 0.111 | 0.06143                                 | 0.00033 | 0.0851                                 | 0.0008 | 527                                    | 5  |
| 16.1                        | 63         | 49          | 0.77 | 8.1                         | 2 423                                   | 0.529                 | 6.629                                  | 0.101 | 0.07363                                 | 0.00073 | 0.1501                                 | 0.0023 | 901                                    | 13 |
| 17.1                        | 169        | 96          | 0.57 | 12.3                        | 7 208                                   | 0.398                 | 11.754                                 | 0.115 | 0.06115                                 | 0.00050 | 0.0847                                 | 0.0008 | 524                                    | 5  |
| <b>Santa Maria (ISM 05)</b> |            |             |      |                             |                                         |                       |                                        |       |                                         |         |                                        |        |                                        |    |
| 1.1                         | 60         | 21          | 0.35 | 5.9                         | -                                       | -                     | 8.821                                  | 0.133 | 0.06173                                 | 0.00065 | 0.1134                                 | 0.0017 | 692                                    | 10 |
| 2.1                         | 1507       | 32          | 0.02 | 62.8                        | 10 978                                  | -                     | 20.741                                 | 0.300 | 0.05048                                 | 0.00036 | 0.0482                                 | 0.0007 | 304                                    | 4  |
| 2.2                         | 1710       | 32          | 0.02 | 73.6                        | -                                       | -                     | 20.090                                 | 0.512 | 0.05001                                 | 0.00034 | 0.0498                                 | 0.0013 | 313                                    | 8  |
| 3.1                         | 664        | 614         | 0.93 | 52.6                        | -                                       | -                     | 10.933                                 | 0.210 | 0.05674                                 | 0.00041 | 0.0915                                 | 0.0018 | 564                                    | 10 |
| 4.1                         | 2052       | 148         | 0.07 | 130.3                       | 11 514                                  | -                     | 13.625                                 | 0.225 | 0.05358                                 | 0.00033 | 0.0734                                 | 0.0012 | 457                                    | 7  |
| 5.1                         | 1570       | 145         | 0.09 | 62.9                        | 3 531                                   | 0.291                 | 21.501                                 | 0.427 | 0.05451                                 | 0.00037 | 0.0464                                 | 0.0009 | 292                                    | 6  |
| 5.2                         | 1621       | 50          | 0.03 | 71.0                        | 956                                     | 1.546                 | 19.400                                 | 0.289 | 0.06520                                 | 0.00090 | 0.0508                                 | 0.0008 | 319                                    | 5  |
| 6.1                         | 567        | 25          | 0.04 | 36.1                        | -                                       | -                     | 13.593                                 | 0.305 | 0.05367                                 | 0.00034 | 0.0736                                 | 0.0016 | 458                                    | 10 |
| 8.1                         | 2804       | 51          | 0.02 | 115.1                       | 1 811                                   | 0.562                 | 20.887                                 | 0.573 | 0.05684                                 | 0.00049 | 0.0476                                 | 0.0013 | 300                                    | 8  |
| 10.1                        | 2957       | 107         | 0.04 | 134.5                       | 334                                     | 4.665                 | 17.956                                 | 0.680 | 0.09057                                 | 0.00280 | 0.0531                                 | 0.0020 | 333                                    | 12 |
| 11.1                        | 1896       | 47          | 0.02 | 80.1                        | 1 028                                   | 1.181                 | 20.157                                 | 0.522 | 0.06202                                 | 0.00093 | 0.0490                                 | 0.0013 | 309                                    | 8  |
| 12.1                        | 1503       | 18          | 0.01 | 68.9                        | 12 973                                  | -                     | 18.857                                 | 0.305 | 0.05059                                 | 0.00040 | 0.0530                                 | 0.0009 | 333                                    | 5  |
| 12.2                        | 1380       | 17          | 0.01 | 62.1                        | 60 949                                  | -                     | 19.191                                 | 0.282 | 0.05195                                 | 0.00050 | 0.0521                                 | 0.0008 | 327                                    | 5  |
| 12.3                        | 1790       | 23          | 0.01 | 80.5                        | 75 209                                  | -                     | 19.224                                 | 0.387 | 0.05137                                 | 0.00039 | 0.0520                                 | 0.0010 | 327                                    | 6  |
| 14.1                        | 1599       | 22          | 0.01 | 67.8                        | 1 144                                   | 1.210                 | 20.093                                 | 0.330 | 0.06228                                 | 0.00062 | 0.0492                                 | 0.0008 | 309                                    | 5  |
| 15.1                        | 1611       | 226         | 0.14 | 144.7                       | 11 472                                  | -                     | 9.620                                  | 0.176 | 0.05808                                 | 0.00038 | 0.1039                                 | 0.0019 | 638                                    | 11 |
| 16.1                        | 819        | 177         | 0.22 | 47.4                        | 3 227                                   | 0.210                 | 14.406                                 | 0.354 | 0.05723                                 | 0.00047 | 0.0693                                 | 0.0017 | 432                                    | 10 |
| 18.1                        | 669        | 68          | 0.10 | 46.0                        | 2 328                                   | 0.313                 | 12.531                                 | 0.552 | 0.05963                                 | 0.00042 | 0.0796                                 | 0.0035 | 493                                    | 21 |
| <b>Cala d'Olivia</b>        |            |             |      |                             |                                         |                       |                                        |       |                                         |         |                                        |        |                                        |    |
| 1.1                         | 331        | 138         | 0.42 | 20.0                        | 4 525                                   | 0.047                 | 14.343                                 | 0.274 | 0.05634                                 | 0.00034 | 0.0697                                 | 0.0013 | 434                                    | 8  |
| 1.2                         | 193        | 118         | 0.61 | 11.7                        | 881                                     | 1.472                 | 14.106                                 | 0.336 | 0.06788                                 | 0.00155 | 0.0698                                 | 0.0017 | 435                                    | 10 |
| 3.1                         | 416        | 101         | 0.24 | 27.9                        | 1 736                                   | 0.031                 | 12.893                                 | 0.444 | 0.05747                                 | 0.00030 | 0.0775                                 | 0.0027 | 481                                    | 16 |
| 4.1                         | 144        | 59          | 0.41 | 8.6                         | 1 112                                   | -                     | 14.405                                 | 0.429 | 0.05592                                 | 0.00032 | 0.0694                                 | 0.0021 | 433                                    | 12 |
| 4.2                         | 126        | 71          | 0.56 | 7.9                         | -                                       | 0.005                 | 13.725                                 | 0.097 | 0.05607                                 | 0.00029 | 0.0729                                 | 0.0005 | 453                                    | 3  |
| 7.2                         | 143        | 50          | 0.35 | 9.1                         | 778                                     | 0.360                 | 13.559                                 | 0.287 | 0.06014                                 | 0.00083 | 0.0735                                 | 0.0016 | 457                                    | 9  |
| 8.1                         | 101        | 42          | 0.41 | 8.4                         | 2 260                                   | 0.211                 | 10.447                                 | 0.159 | 0.06028                                 | 0.00038 | 0.0955                                 | 0.0014 | 588                                    | 9  |
| 9.1                         | 215        | 35          | 0.17 | 13.0                        | 1 404                                   | 0.060                 | 14.337                                 | 0.314 | 0.05645                                 | 0.00027 | 0.0697                                 | 0.0015 | 434                                    | 9  |
| 9.2                         | 133        | 41          | 0.31 | 8.2                         | 12 363                                  | -                     | 14.128                                 | 0.099 | 0.05538                                 | 0.00030 | 0.0708                                 | 0.0005 | 441                                    | 3  |
| 12.2                        | 195        | 128         | 0.66 | 11.7                        | 6 043                                   | 0.017                 | 14.401                                 | 0.091 | 0.05567                                 | 0.00034 | 0.0694                                 | 0.0004 | 433                                    | 3  |
| 13.1                        | 448        | 182         | 0.41 | 43.0                        | 13 981                                  | 0.242                 | 9.013                                  | 0.140 | 0.06188                                 | 0.00024 | 0.1107                                 | 0.0017 | 677                                    | 10 |
| 15.1                        | 240        | 45          | 0.19 | 21.9                        | -                                       | 0.056                 | 9.467                                  | 0.199 | 0.06036                                 | 0.00030 | 0.1056                                 | 0.0022 | 647                                    | 13 |
| 18.1                        | 200        | 76          | 0.38 | 12.2                        | 12 216                                  | 0.014                 | 14.176                                 | 0.145 | 0.05579                                 | 0.00026 | 0.0705                                 | 0.0007 | 439                                    | 4  |
| 19.1                        | 231        | 200         | 0.87 | 13.8                        | 6 518                                   | 0.033                 | 14.465                                 | 0.107 | 0.05574                                 | 0.00028 | 0.0691                                 | 0.0005 | 431                                    | 3  |

Notes : [1] Uncertainties given at oneσ level.

[2] f<sub>206</sub> % denotes the percentage de <sup>206</sup>Pb that is common Pb

[3] Correction for common Pb made using the measured <sup>238</sup>U/<sup>206</sup>Pb and <sup>207</sup>Pb/<sup>206</sup>Pb ratios following Tera and Wasserburg (1972) as outlined in Williams (1998).
